# Supplementary material for: The tobacco-specific carcinogen NNK induces DNA methyltransferase 1 accumulation and tumor suppressor gene hypermethylation in mice and lung cancer patients
Source: JCI journal article supplement (doi:10.1172/jci40706), 2010-01-21
Supplement: sd1 [file 1]

## **Supplemental Information**

### **Tobacco-specific Carcinogen Induces DNA Methyltransferases 1 Accumulation through AKT/GSK3 $\beta$ /TrCP/hnRNP-U in Mice and Lung Cancer patients**

Ruo-Kai Lin,<sup>1</sup> Yi-Shuan Hsieh,<sup>2</sup> Pinpin Lin,<sup>3</sup> Han-Shui Hsu,<sup>4</sup> Chih-Yi Chen,<sup>5</sup> Yen-An Tang<sup>1</sup>, Chung-Fan Lee,<sup>6</sup> and Yi-Ching Wang<sup>1,\*</sup>

## Supplemental figures and legends

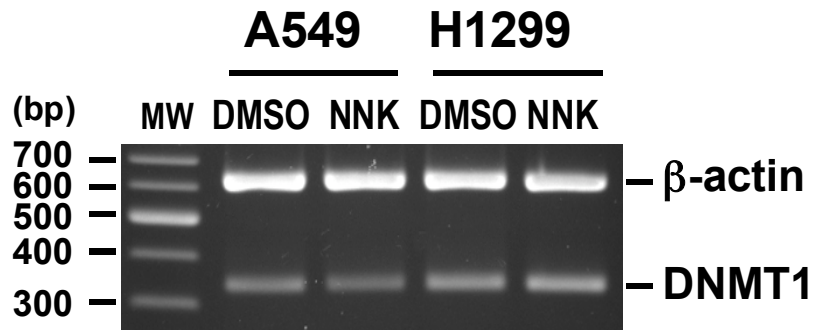

**Supplemental Figure 1 NNK-treated A549 and H1299 cells showed no change in the endogenous *DNMTs* mRNA expression levels.**

The expression level was measured by RT-PCR. The housekeeping gene  *$\beta$ -actin* was used as an internal control.

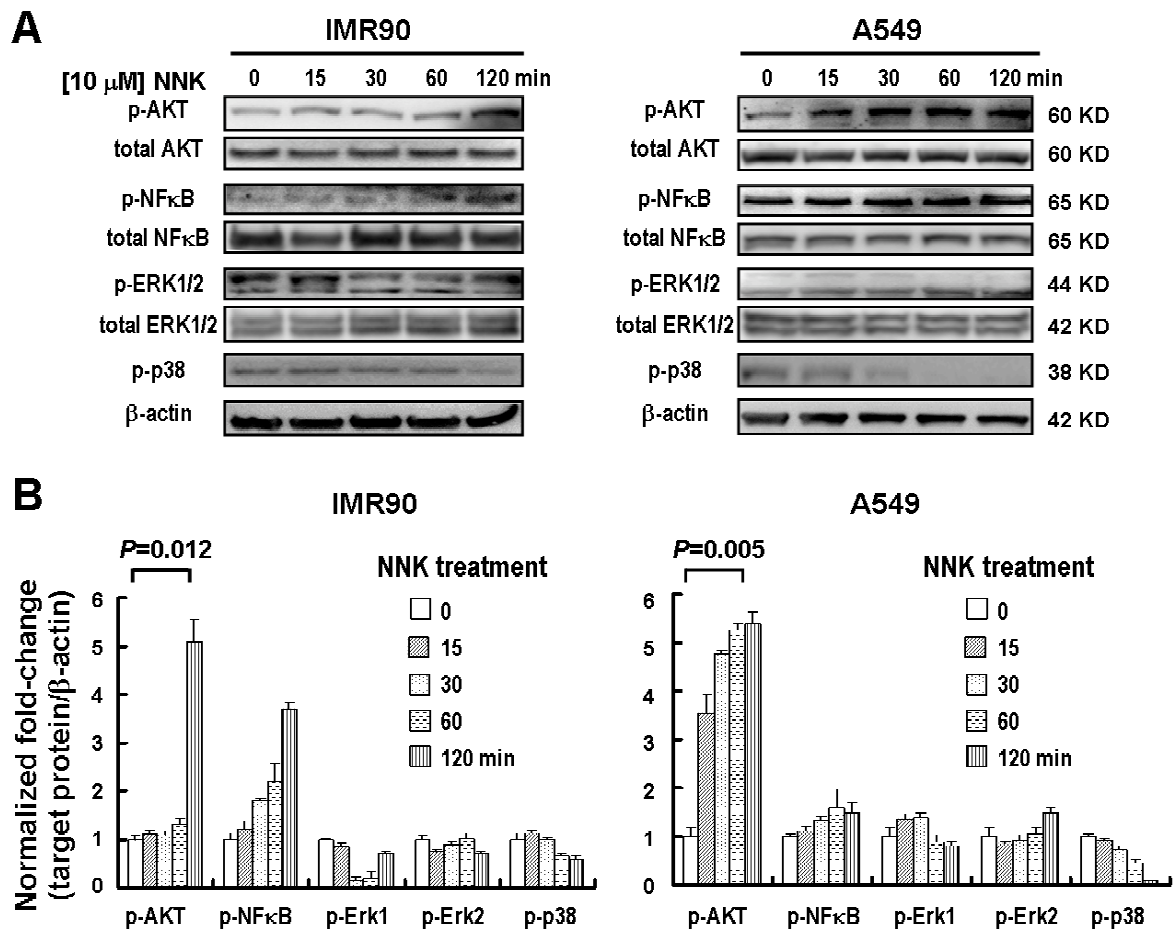

**Supplemental Figure 2 The signaling pathways induced by NNK.**

(A) IMR90 normal lung cell line and A549 lung cancer cell lines were treated with 10  $\mu$ M NNK for various times as indicated. Phosphorylation of AKT was analyzed by Western blotting using phospho-AKT at Ser473 antibody. Total AKT antibody was used to confirm and quantify AKT protein. Western blot analysis was performed to detect phosphorylated NF $\kappa$ B or total NF $\kappa$ B by using a phospho-specific NF $\kappa$ B or total NF $\kappa$ B antibodies; phosphorylated ERK1/2 or total ERK1/2 by using a phospho-specific ERK1/2 or a mixture of ERK1 and ERK2 antibodies. Phosphorylation of p38 was analyzed by Western blotting using phospho-p38 antibody.  $\beta$ -actin used an internal control.

(B) Quantitative figures were determined from at least three experiments. Columns, mean; bars,  $\pm$ SEM. and  $P$  values are as indicated.

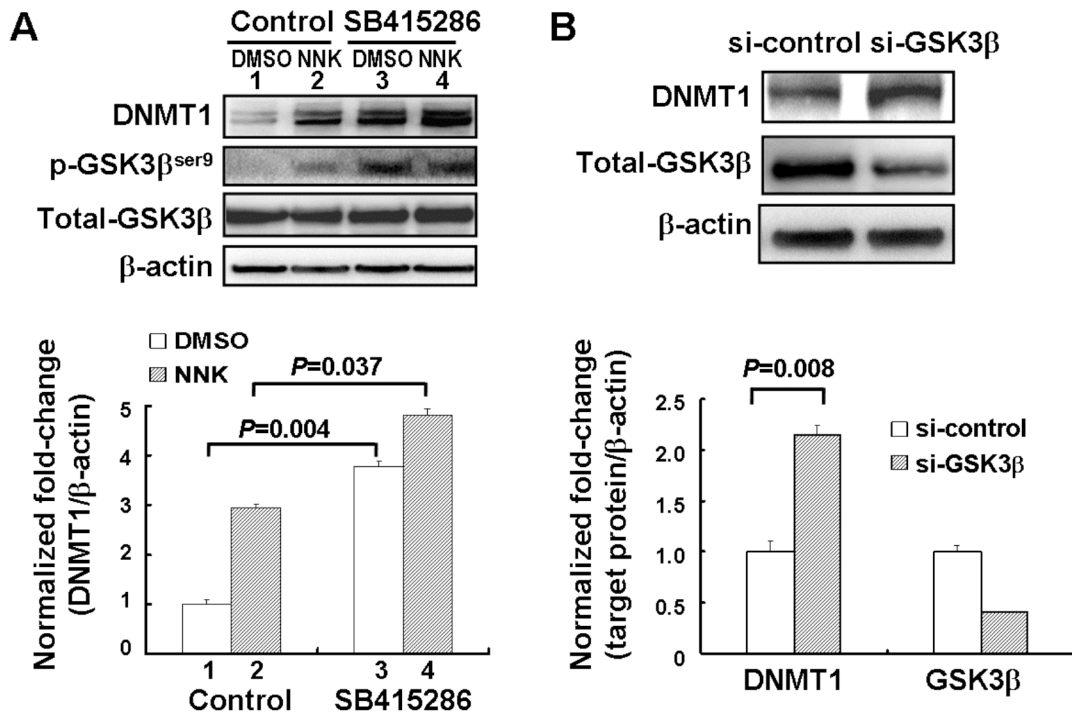

**Supplemental Figure 3 GSK3β involved in DNMT1 protein degradation and the increase of DNMT1 protein level by NNK in IMR90 cells.**

**(A)** IMR90 cells were treated with or without 25  $\mu$ M GSK3 $\beta$  inhibitor, SB415286 for 24 hr, and then treated with 10  $\mu$ M NNK for 2 hr. Increased in DNMT1 protein expression after inhibition of GSK3 $\beta$  activity by NNK and SB415286 was observed (lanes 2-4 versus lane 1 in DNMT1 level). Phosphorylated GSK3 $\beta^{\text{ser9}}$  (inactive form can be seen after NNK and SB415286 treatment (lanes 2-4 versus lane 1 in GSK3 $\beta^{\text{ser9}}$  level). Protein expression levels of DNMT1, phosphorylation of GSK3 $\beta^{\text{ser9}}$ , and total GSK3 $\beta$  were analyzed by Western blotting with  $\beta$ -actin as an internal control. Densitometry showing the change of DNMT1 protein level. **(B)** Knockdown of GSK3 $\beta$  in cells treated by siRNA enhanced DNMT1 protein level. Columns, mean; bars,  $\pm$ SEM (n=3). *P* values are as indicated.

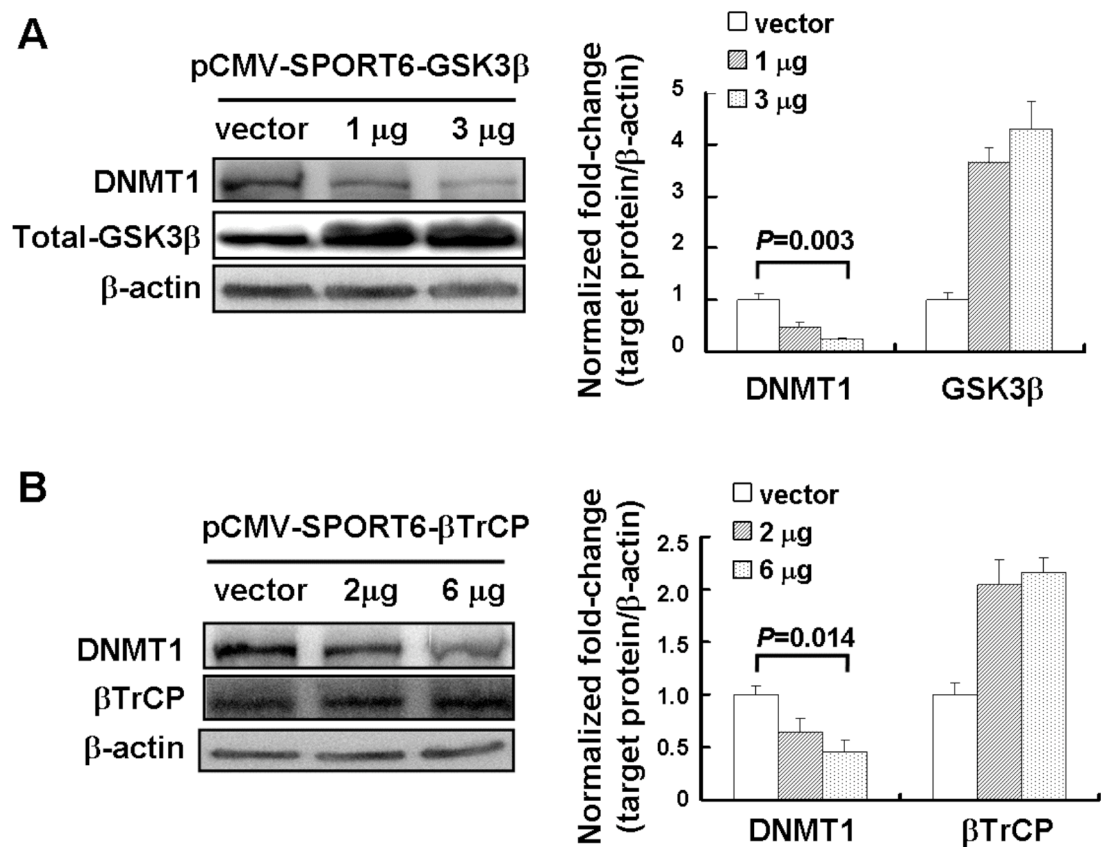

**Supplemental Figure 4 Exogenous GSK3 $\beta$  and  $\beta$ TrCP induced DNMT1 protein degradation.**

(A) GSK3 $\beta$  and (B)  $\beta$ TrCP promoted DNMT1 protein degradation in a dose-dependent manner as seen using both Western blot and densitometry assays. A549 cells were transfected with pCMV-SPORT6-GSK3 $\beta$  or pCMV-SPORT6- $\beta$ TrCP at indicated doses for 24 h. Columns, mean; bars,  $\pm$ SEM (n=3). *P* values are as indicated.

**DNMT1 (green) and  
p-GSK3 $\beta$ <sup>Ser9</sup> (red)**

**Control**

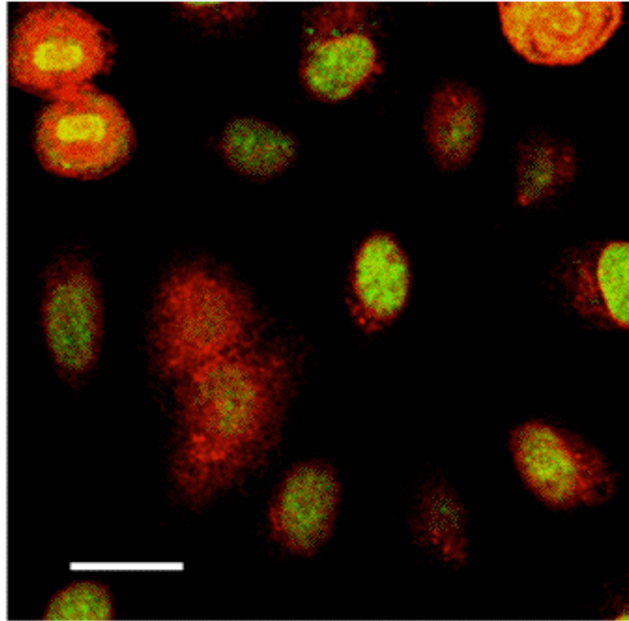

**NNK**

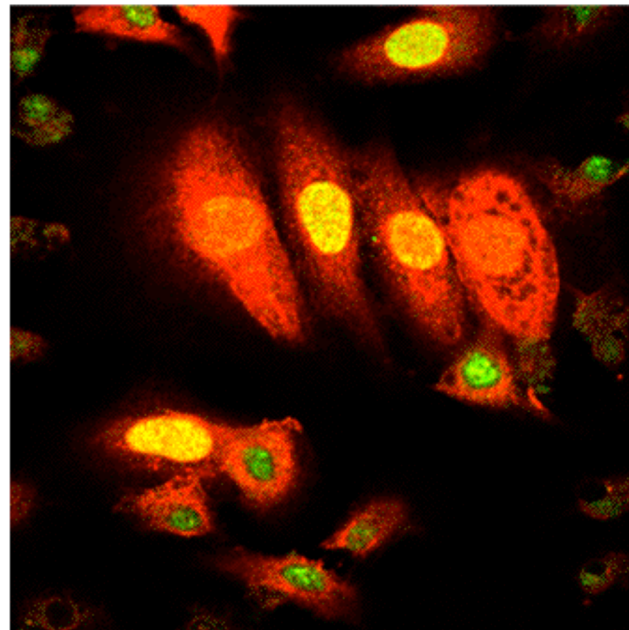

**Supplemental Figure 5 An increase of DNMT1 and p-GSK3 $\beta$ <sup>Ser9</sup> expression and their co-localization (yellow color) were observed in cells treated with NNK.**

Immunofluorescence staining of DNMT1 (green color) and p-GSK3 $\beta$ <sup>Ser9</sup> (red color) was performed and visualized by confocal microscopy. Scale bar: 40  $\mu$ m.

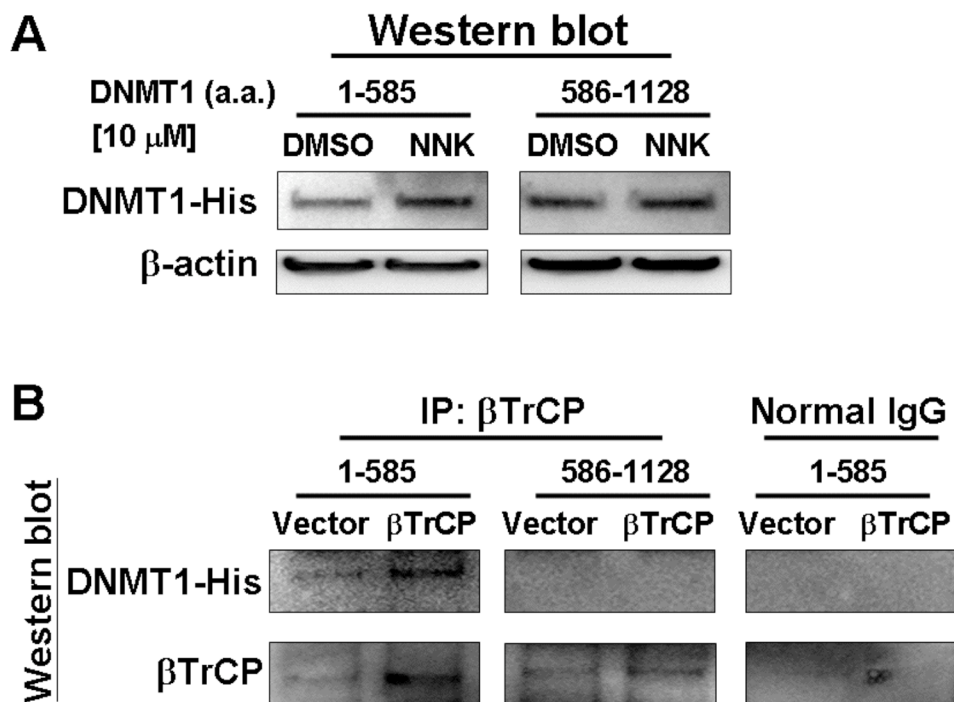

**Supplemental Figure 6 The N-terminal domain of DNMT1 could be induced by NNK treatment which was important for  $\beta$ TrCP interaction.**

(A) Analysis of two cDNA deletion constructs of His-tag DNMT1 expression vector, which contained either amino acids 1-585 or 585-1128 of DNMT1, are shown. The N-terminal domain of 1-585 amino acids could be induced by NNK treatment. (B) Immunoprecipitation assay was performed in A549 cells transfected with control vector or pCMV-SPORT6- $\beta$ TrCP with various regions for 24 hr. Cell lysates were immunoprecipitated with anti- $\beta$ TrCP antibody and Western blotted with anti-His-DNMT1 antibody. Normal-IgG is a negative control. Data demonstrated that N-terminal domain of 1-585 amino acids of DNMT1 was important for  $\beta$ TrCP interaction.

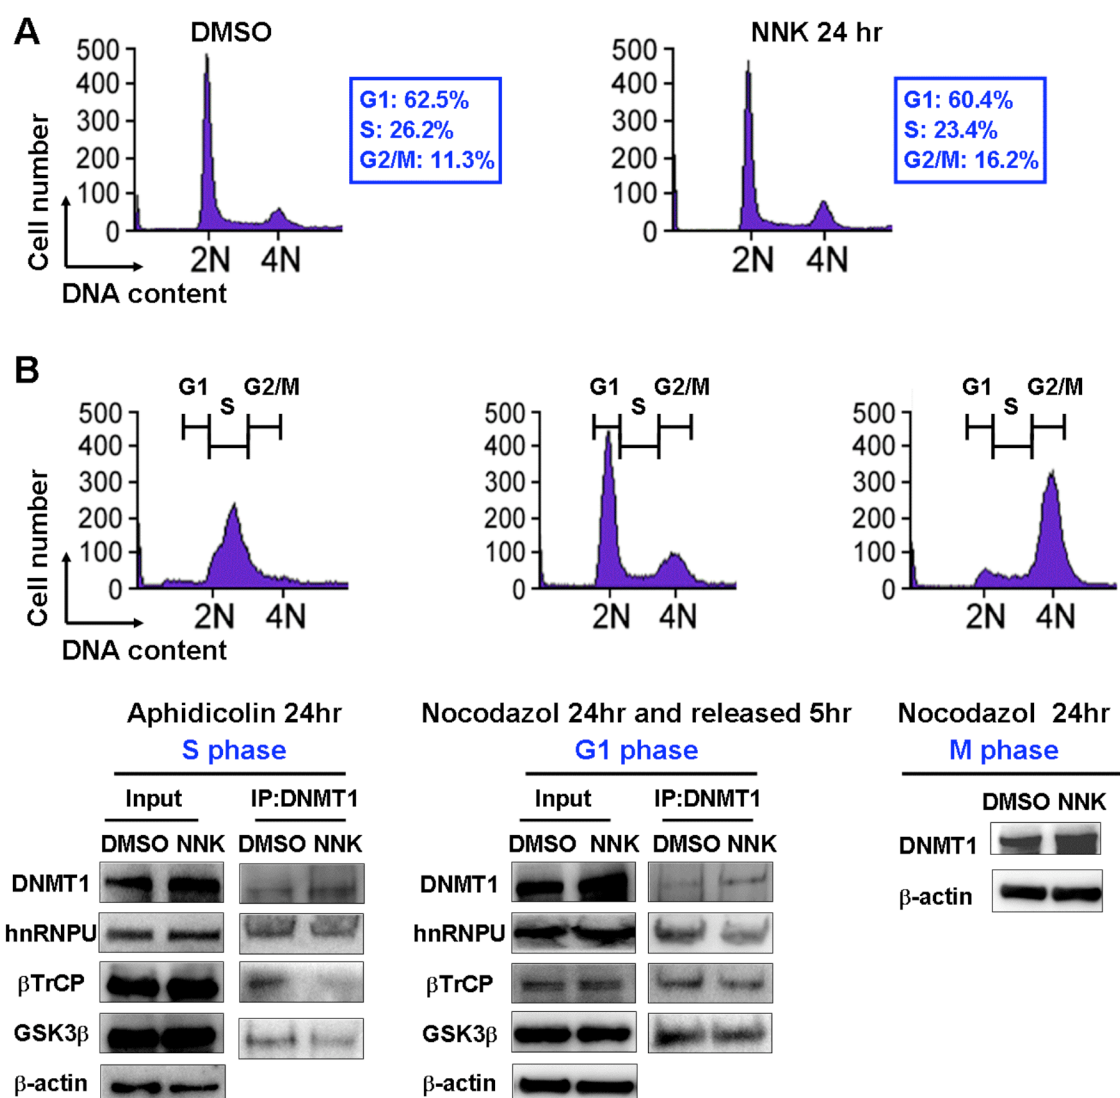

**Supplemental Figure 7 NNK-induced DNMT1 accumulation by AKT/GSK3 $\beta$ / $\beta$ TrCP/hnRNP-U signaling pathway was not due to the impact of NNK treatment on the cell cycle.**

(A) Flow cytometry showed that 10 $\mu$ M of NNK treatment for 24 hours did not change cell cycle distribution in A549 cells (upper panel). **(B)** Flow cytometry was performed in A549 cells treated with aphidocolin, nocodazole, and 5 hour post-release from nocodazole to confirm the induction of S, G2/M, and G1 phases, respectively. Western or Immunoprecipitation assay (lower panel) of cell treated with 10  $\mu$ M NNK at specific cell cycle phases to show the induction of DNMT1 protein level and the interaction between DNMT1 and hnRNPU,  $\beta$ TrCP, and GSK3 $\beta$ . Data demonstrated that NNK-induced DNMT1 accumulation could be seen in all phases of cell cycle.

## Supplemental Tables

**Supplemental Table 1** Multivariate Analysis of factors associated with poor survival<sup>A</sup>.

| Variable             | Risk Ratio | 95%CI               | <i>P</i> |
|----------------------|------------|---------------------|----------|
| Age                  | 0.965949   | (0.629407-1.425018) | 0.8660   |
| Tumor type           | 1.000318   | (0.709554-1.391339) | 0.9985   |
| Tumor stage          | 1.085139   | (0.767648-1.541339) | 0.6432   |
| Smoking and DNMT1(+) | 1.524797   | (1.099739-2.143316) | 0.0114   |

<sup>A</sup>. Results were analyzed by the Cox proportional hazards regression modal.

**Supplemental Table 2** The mRNA expression of DNMT1 was not associated with the smoking status of patients <sup>A</sup>

| Characteristics                | <u>DNMT1 mRNA</u> |                    |                            |
|--------------------------------|-------------------|--------------------|----------------------------|
|                                | Total             | Non-overexpression | Overexpression             |
|                                | N                 | N (%)              | N (%)                      |
| <b>Overall</b>                 | 85                | 48 (51.1)          | 37 (48.9)                  |
| <b>Smoking habit</b>           |                   |                    |                            |
| <b>Smoker</b>                  | 44                | 25 (58.6)          | 19 (43.2) <sup>0.947</sup> |
| <b>Non-smoker</b> <sup>B</sup> | 41                | 23 (56.1)          | 18 (43.9)                  |

<sup>A</sup>. Results were analyzed by the Pearson Chi-Square test. Degree of freedom = 1. *P* value with significance is shown as superscript.

<sup>B</sup>. The non-smoker group includes ex-smoker and never smoker.

**Supplemental Table 3.** Overexpression of DNMTs proteins and clinical parameters in NSCLC tumors.<sup>A</sup>

| Characteristics                       | Total <sup>B</sup> | <u>DNMT1</u>    |                   |
|---------------------------------------|--------------------|-----------------|-------------------|
|                                       |                    | High expression | Normal expression |
|                                       | n                  | n (%)           | n (%)             |
| Overall                               | 124                | 60 (48.4)       | 64 (51.6)         |
| <u>Clinicopathological parameters</u> |                    |                 |                   |
| Age < 65                              | 35                 | 19 (54.3)       | 16 (45.7)         |
| ≥ 65                                  | 89                 | 41 (46.1)       | 48 (53.9)         |
| Tumor type                            |                    |                 |                   |
| SQ                                    | 48                 | 24 (50.0)       | 24 (50.0)         |
| AD                                    | 67                 | 33 (49.3)       | 34 (50.7)         |
| Tumor stage                           |                    |                 |                   |
| I + II                                | 60                 | 28 (46.7)       | 32 (53.3)         |
| III + IV                              | 64                 | 32 (50.0)       | 32 (50.0)         |

<sup>A</sup>. Results were analyzed by the Pearson Chi-Square test. Degree of freedom = 1. *P* value with significance is shown as superscript.

<sup>B</sup>. Total number of samples (n) in some categories is less than the overall number analyzed because clinical data was not available for some samples.

**Supplemental Table 4** The antibodies and their reaction conditions used in the present study

| Target                                        | K.D.  | Raised In | Application          | Dilution | Source               | Catalog No.   |
|-----------------------------------------------|-------|-----------|----------------------|----------|----------------------|---------------|
| Anti-DNMT1                                    | 190   | Chicken   | Western blot         | 1:10000  | Asia Hepato Gene Co. | A22659        |
|                                               |       |           | Immunoprecipitation  | 1:100    |                      |               |
|                                               |       |           | Immunohistochemistry | 1:500    |                      |               |
|                                               |       |           | Immunofluorescence   |          |                      |               |
|                                               |       | Mouse     | Immunohistochemistry | 1:30     | Imgenex              | IMG261A       |
| Anti- $\alpha$ -actin                         | 42    | Mouse     | Western blot         | 1:5000   | Novus Biologicals    | NB 600-501    |
| Anti-LAMIN A/C                                | 62/69 | Mouse     | Western blot         | 1:2000   | Santa Cruz           | sc-7292       |
| Anti-GAPDH                                    | 38    | Mouse     | Western blot         | 1:2000   | Santa Cruz           | Sc-32233      |
| Anti-AKT                                      | 60    | Rabbit    | Western blot         | 1:1000   | Cell Signaling       | 9272          |
|                                               |       |           | Immunoprecipitation  | 1:100    |                      |               |
| Anti-phospho-AKT <sup>Ser473</sup>            | 60    | Rabbit    | Western blot         | 1:500    | Cell Signaling       | 9271          |
|                                               |       |           | Immunohistochemistry | 1:30     |                      | 3787          |
| Anti-Erk1/2                                   | 42,44 | Rabbit    | Western blot         | 1:1000   | Upstate              | 06-182        |
| Anti-phospho-Erk1/2                           | 42/44 | Mouse     | Western blot         | 1:1000   | Upstate              | 05-481        |
| Anti-phospho-p38 <sup>Thr180</sup>            | 38    | Rabbit    | Western blot         | 1:1000   | Chemicon             | AB3828        |
| Anti-NF- $\kappa$ B                           | 65    | Rabbit    | Western blot         | 1:1000   | Upstate              | 06-418        |
| Anti-phospho-NF- $\kappa$ B <sup>Ser536</sup> | 65    | Rabbit    | Western blot         | 1:1000   | Cell Signaling       | 3031          |
| Anti-GSK3 $\beta$                             | 46    | Rabbit    | Western blot         | 1:5000   | Cell Signaling       | 9315          |
|                                               |       |           | Immunoprecipitation  | 1:125    |                      |               |
| Anti-phospho-GSK3 $\beta$ <sup>Ser9</sup>     | 46    | Rabbit    | Western blot         | 1:1000   | Nuvus                | NB100 - 81948 |
|                                               |       |           | Immunohistochemistry | 1:100    |                      |               |
|                                               |       |           | Immunofluorescence   | 1:100    |                      |               |
| Anti- $\beta$ TrCP                            | 70    | Mouse     | Western blot         | 1:500    | Zymed                | 37-3400       |
|                                               |       | Goat      | Immunohistochemistry | 1:300    | Santa Cruz           | sc-8862       |
|                                               |       |           | Immunofluorescence   |          |                      |               |
|                                               |       |           | Immunoprecipitation  | 1:25     |                      |               |
| Anti-p53                                      | 53    | Mouse     | Western blot         | 1:1000   | DAKO                 | DO-7          |

|                     |                 |        |                      |        |                   |          |
|---------------------|-----------------|--------|----------------------|--------|-------------------|----------|
| Anti-His            | -- <sup>A</sup> | Rabbit | Western blotting     | 1:500  | Cell<br>Signaling | 2365     |
|                     |                 |        | Immunoprecipitation  | 1:50   |                   |          |
| Anti-phospho-serine | -- <sup>A</sup> | Mouse  | Western blotting     | 1:500  | Sigma             | P3430    |
|                     |                 |        | Immunoprecipitation  | 1:50   |                   |          |
| Anti-hnRNP-U        | 130             | Mouse  | Western blotting     | 1:2000 | Santa<br>Cruz     | sc-32315 |
|                     |                 |        | Immunofluorescence   | 1:50   |                   |          |
|                     |                 |        | Immunoprecipitation  |        |                   |          |
| Anti-hnRNP-U        | 130             | Rabbit | Immunofluorescence   | 1:50   | Santa<br>Cruz     | sc-25374 |
|                     |                 |        | Immunohistochemistry |        |                   |          |
| Anti-ubiquitin      | -- <sup>A</sup> | Mouse  | Western blotting     | 1:1000 | Santa<br>Cruz     | sc-8017  |
|                     |                 |        | Immunoprecipitation  | 1:50   |                   |          |

<sup>A</sup> . -- Molecular weight is variable .

**Supplemental Table 5** List of primers and siRNA sequences and their reaction conditions used in the present study

| Gene <sup>A</sup>                    | primer             | 5' → 3' sequences                                           | PCR size | Tm   | Cycle |
|--------------------------------------|--------------------|-------------------------------------------------------------|----------|------|-------|
| <i>DNMT1</i> -RT-PCR                 | Forward<br>Reverse | ACCGCTTCTACTTCCTCGAGGCCTA<br>GTTGCAGTCCTCTGTGAACACTGTGG     | 334      | 60°C | 30    |
| <i>-actin</i> -RT-PCR                | Forward<br>Reverse | ACACTGTGCCCATCTACGAGG<br>AGGGGCCGGACTCGTCATACT              | 618      | 60°C | 30    |
| <i>p16</i> -Bis-sequencing           | Forward<br>Reverse | GTTTTTTTGTGGAAAGATAT<br>CRCCRCACCTCCTCTACCC                 | 278      | 54°C | 35    |
| <i>p16</i> -methyl-MSP-O             | Forward<br>Reverse | GTTTTTTTGTGGAAAGATAT<br>CTACCCATCATCATAACCTAAATC            | 232      | 54°C | 35    |
| <i>p16</i> -methyl-MSP-U             | Forward<br>Reverse | TTATTAGAGGGTGGGGTGGATTGT<br>CAACCCCAAACCACAACCATAA          | 151      | 65°C | 35    |
| <i>p16</i> -methyl-MSP-M             | Forward<br>Reverse | TTATTAGAGGGTGGGGCGGATCGC<br>GACCCCGAACCGCGACCTAA            | 150      | 65°C | 35    |
| <i>RAR<sub>α</sub></i> -methyl-MSP-O | Forward<br>Reverse | AAGTGAGTTGTTTAGAGGTAGGAGGG<br>CCTATAATTAATCCAAATAATCATTTACC | 280      | 54°C | 35    |
| <i>RAR<sub>α</sub></i> -methyl-MSP-U | Forward<br>Reverse | TTGAGAATGTGAGTGATTTGA<br>AACCAATCCAACCAAAACAA               | 146      | 54°C | 35    |
| <i>RAR<sub>α</sub></i> -methyl-MSP-M | Forward<br>Reverse | TCGAGAACGCGAGCGATTCTG<br>GACCAATCCAACCGAAACGA               | 146      | 54°C | 35    |
| <i>FHIT</i> -methyl-MSP-O            | Forward<br>Reverse | TAGTGGGTATATTTTATAG<br>ATCCCACCCTAAAACCTC                   | 249      | 50°C | 40    |
| <i>FHIT</i> -methyl-MSP-U            | Forward            | GAAGGTAGGGGTGGGGAGGTAAGTT                                   | 116      | 68°C | 35    |

|                                        |                    |                                                        |     |      |    |
|----------------------------------------|--------------------|--------------------------------------------------------|-----|------|----|
|                                        | Reverse            | CATAACAACACCAACCCCACTA                                 |     |      |    |
| <i>FHIT</i> -methyl-MSP-M              | Forward<br>Reverse | GAAGGTAGGGGCGGGGAGGTAAGTT<br>CGTAAACGACGCCAACCCCACTA   | 116 | 68°C | 35 |
| <i>p16</i> -promoter-ChIP              | Forward<br>Reverse | TTGAAGCTGGTCTTTGGAT<br>ATCGAAATCACCTGTACGACT           | 400 | 65°C | 35 |
| <i>RAR</i> <sub>1</sub> -promoter-ChIP | Forward<br>Reverse | GGCAACCAACATGGCTATTT<br>TATAGTGGTCAAGAGCATGGGT         | 401 | 65°C | 35 |
| <i>FHIT</i> -promoter-ChIP             | Forward<br>Reverse | ATGCTCTGCGCGTATTGGC<br>GGTGATGACCTGACGCG               | 322 | 61°C | 35 |
| <i>GAPDH</i> -promoter-ChIP            | Forward<br>Reverse | AATGAAAGGCACACTGTCTCTCTC<br>GTTTCTGCACGGAAGGTCAC       | 218 | 65°C | 35 |
| RNAi of <i>AKT</i>                     | Forward<br>Reverse | AUUCUUGAGGAGGAAGUAGCGUGGC<br>GCCACGCUACUCCUCCUCAAGAAU  |     |      |    |
| RNAi of GSK3 $\beta$                   | Forward<br>Reverse | AUUACUUGACAGUUCUUGAGUGGUG<br>CACCACUCAAGAACUGUCAAGUAAU |     |      |    |

<sup>A</sup> RT-PCR: reverse-transcriptase polymerase chain reaction; MSP: methylation-specific PCR; O: outer primer; U: unmethylation - specific primer; M: methylation-specific primer; ChIP: chromatin immunoprecipitation; RNAi: interference RNA.
